# Supplementary material for: More than meets the eye: neural correlates of consciousness in the sound-induced flash illusion
Source: Research Square preprint supplement (doi:10.21203/rs.3.rs-7535859/v1), 2025-09-23
Supplement: Supplementary file [file 5b419c7cab7083da3def682b.pdf]

1

2 **Supplementary Materials**

3 **for**

4 **More than meets the eye: neural correlates of consciousness in the sound-**  
5 **induced flash illusion**

6 Theresa Rieger<sup>1,2+,\*</sup>, Josefine Feuerstein<sup>1+</sup>, Niko A. Busch<sup>2,3</sup>, Thomas Straube<sup>1,2</sup> &  
7 Maximilian Bruchmann<sup>1,2</sup>

8

9 <sup>1</sup> Institute of Medical Psychology and Systems Neuroscience, University of Muenster

10 <sup>2</sup> Otto Creutzfeldt Center for Cognitive and Behavioral Neuroscience, University of  
11 Muenster

12 <sup>3</sup> Institute of Psychology, University of Muenster

13 <sup>+</sup> these authors contributed equally to this work

14

15

16 \* Corresponding author: Theresa Rieger

17

18 **Correspondence address:**

19 Institute of Medical Psychology and Systems Neuroscience  
20 University of Münster  
21 Von-Esmarch-Str. 52, D-48149 Münster, Germany  
22 e-mail: [theresa.rieger@uni-muenster.de](mailto:theresa.rieger@uni-muenster.de)

## Data exploration for all experimental conditions

To appropriately contextualize the ERPs of a second illusory stimulus, it seems useful to first establish an overview of the general ERPs elicited by a second flash in this paradigm. Topographic time series were plotted for all conditions (Figure 3A).

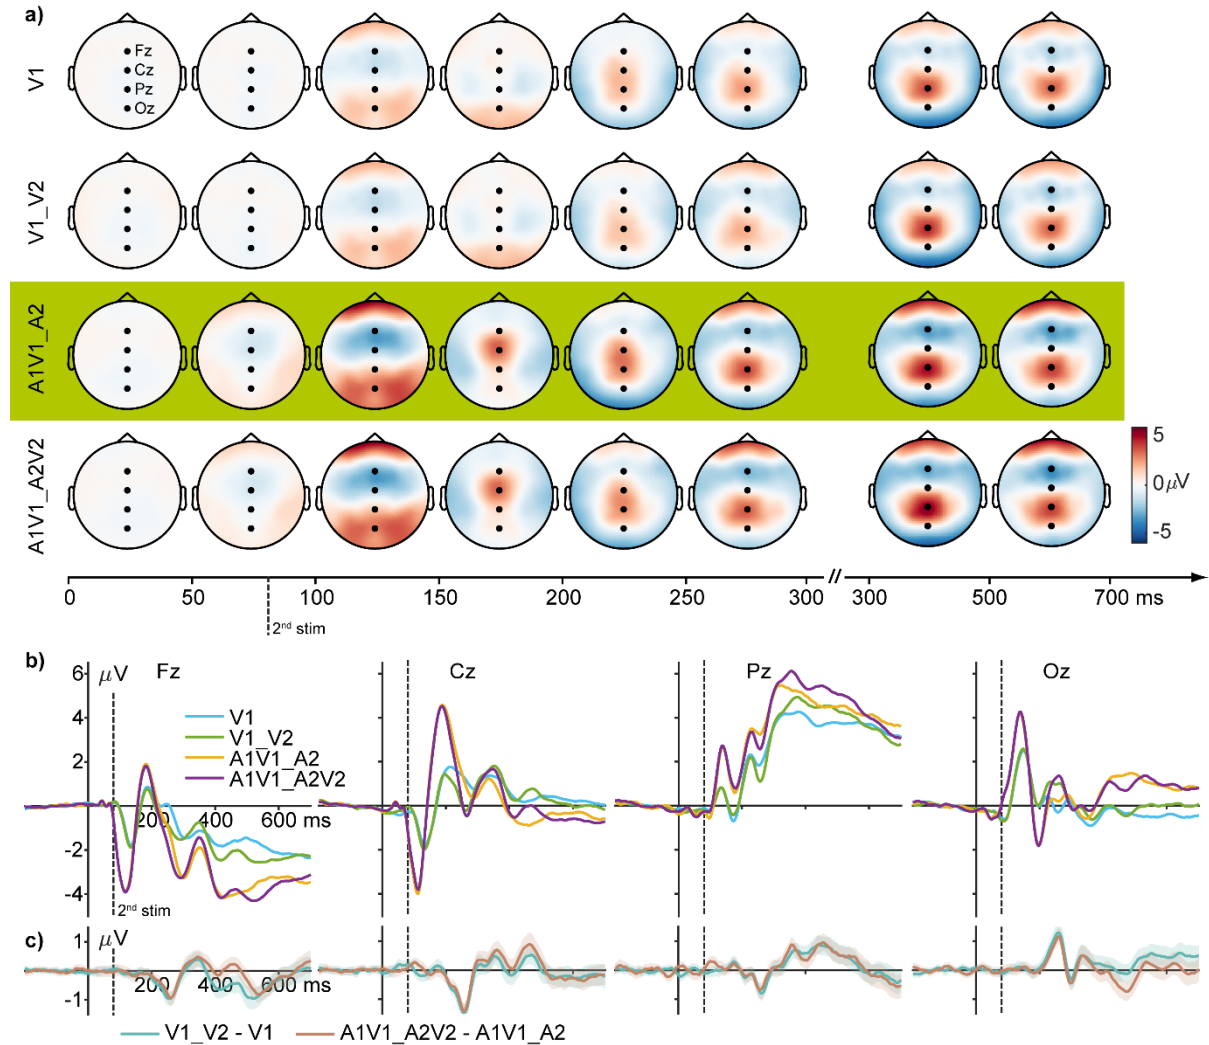

**Supplementary Figure S1.** Spatiotemporal dynamics and neural signatures across experimental conditions **(a)** Topographic time series for all conditions. Scalp distribution of electrical potential. V = Visual stimulus; A = Auditory stimulus; 1 = first stimulus; 2 = second stimulus. The time series ranges from 0 to 700 ms post-stimulus onset. Time steps are 50 ms from 0-300 ms and then larger (200 ms 300-700 ms). Positive potentials are represented by warmer colors (e.g., red/orange), while negative potentials are represented by cooler colors (e.g., light/dark blue). Exemplary electrodes Fz, Cz, Pz, Oz. **(b)** Related potentials per condition and neural response to a second stimulus. ERPs recorded at four representative sites (Fz, Pz, Cz, and Oz) for different conditions (blue: V1\_0, green: V1\_V2, yellow: A1V1\_A2, and purple: A1V1\_A2V2). **(c)** Difference waveforms (right subplots) highlight the contrasts between V1\_V2 - V1\_0 and A1V1\_A2V2 - A1V1\_A2 conditions, providing insights into neural responses to the second stimulus (green: visual condition, brown: bimodal condition). Dashed line marks the second stimulus' onset.

1           These visualizations provide an overview of the spatiotemporal ERP patterns.  
2   For broader insights into the electrophysiological effects of the current paradigm,  
3   Supplement Figure S1 illustrates the ERPs from four representative electrodes (Fz,  
4   Cz, Pz, Oz) across all conditions V1\_0, V1\_V2, A1V1\_A2, and A1V1\_A2V2. The  
5   difference waves (see Figure 3C) represent the ERP of the second flash alone, as the  
6   effects of the initial visual stimulus have been subtracted (depicted in green for visual  
7   conditions and brown for bimodal conditions).
